# Supplementary material for: Caregiver Awareness and Preparedness Regarding Pediatric Foreign Body Aspiration and Emergency Response in Poland: a cross-sectional observational study
Source: Research Square preprint supplement (doi:10.21203/rs.3.rs-7190319/v1), 2025-09-17
Supplement: Supplementary file 1 [file e2702f190baf0bc159069892.docx]

Supplementary file 1 - Questionnaire

Eligibility Question

Are you a parent or guardian of a child under the age of 7?

☐Yes ☐No

Section I: Socio-demographic Characteristics

1. How old are you? ……………
   *Please enter your age as a number.*
2. Do you have a medical education background (e.g., nurse, midwife, paramedic, physician)?

☐Yes ☐No

1. Your gender:

☐Female ☐Male

1. Are you currently in a relationship?

☐Yes ☐No

1. How many children live in your household?

☐One

☐Two

☐Three or more

1. Place of residence:

☐ Rural area

☐City (up to 100,000 inhabitants)

☐City (over 100,000 inhabitants)

1. Education level:

☐Primary

☐Vocational

☐Secondary

☐ University

1. Have you ever participated in a first aid course?

☐Yes ☐No

1. Where did you acquire your first aid knowledge?
   *(Select all that apply)*

☐Certified first aid course

☐Driving school course

☐College/university course

☐Workplace training

☐ Independent learning

☐Primary/secondary school

☐I have not received any such training

☐Other ………..

Section II: Knowledge Assessment on Foreign Body Aspiration

1. Did you know that peanuts and other nuts can cause foreign body aspiration accidents?

☐Yes ☐No

1. Did you know that small toys can cause foreign body aspiration accidents?

☐Yes ☐No

1. Did you know that sudden choking is one of the symptoms of foreign body aspiration?

☐Yes ☐No

1. Did you know that sudden coughing is a symptom of foreign body aspiration?

☐Yes ☐No

1. Did you know that foreign body aspiration is most commonly observed in children aged 0–2 years?

☐Yes ☐No

1. Did you know that whole nuts should not be given to children under the age of 3?

☐Yes ☐No

1. Did you know that if a child has a small toy in their mouth, you should not provoke them to cry while trying to remove it?

☐Yes ☐No

1. Did you know that a child should not be allowed to walk or laugh while eating?

☐Yes ☐No

1. Did you know that a cough is considered effective when the child is fully responsive, crying or answering questions, can inhale before coughing, and the cough is loud?

☐Yes ☐No

1. Did you know that a cough is considered ineffective when the child becomes unresponsive, cyanotic, cannot breathe or make sounds, and the cough is quiet and soundless?

☐Yes ☐No

1. Did you know that the first aid for a conscious child with an effective cough is to encourage them to keep coughing?

☐Yes ☐No

1. Did you know that for a conscious infant who does not cough effectively, you should call emergency services and alternate back blows and chest thrusts?

☐Yes ☐No

1. Did you know that if a child stops breathing, resuscitation should begin with airway opening and five rescue breaths?

☐Yes ☐No

1. Did you know that a child who has successfully expelled a foreign body should still be examined by a doctor?

☐Yes ☐No
